# Supplementary material for: Aspects of Health-Related Factors and Nutritional Care Needs by Survival Stage among Female Cancer Patients in South Korea
Source: PLoS One. 2016 Oct 3;11(10):e0163281. doi: 10.1371/journal.pone.0163281 (PMC5047533; doi:10.1371/journal.pone.0163281)
Supplement: S7 Table — (XLSX) [file pone.0163281.s007.xlsx]

## Sheet: S7
S7 Table. Healthy-related QOL(SF-36)1) score by eating problem and by survival stage among Korean female cancer patients
			Physical health	Mental health	Health-related QOL
Eating problem	Both	Having eating problem (n=70)	51.7±25.42)	60.1±18.3	53.7±18.5
		Don’t having problem (n=116)	62.5±23.3	69.3±16.9	67.5±17.9
		p-value	.005*2)	.001*	.000*
	Breast cancer	Having eating problem (n=38)	56.2±25.3	60.6±20.9	57.8±17.7
		Don’t having problem (n=66)	61.5±23.9	69.6±16.7	69.0±17.5
		p-value	0.297	.027*	.003*
	Gynecological cancer	Having eating problem (n=32)	46.4±24.9	59.5±15.1	48.4±18.4
		Don’t having problem (n=50)	63.8±22.7	69.0±17.4	65.6±18.5
		p-value	.002*	.011*	.000*
Survival stage	Both	Extend stage (n=120)	56.4±24.63	64.9±17.7	59.0±19.3
		Long-term stage (n=66)	63.0±23.3	68.5±16.7	68.3±18.0
		p-value	0.072	0.169	.001*
	Breast	Extend stage (n=59)	57.6±24.0	64.1±19.6	60.6±17.9
		Long-term stage (n=45)	62.2±24.9	69.2±17.3	70.5±17.5
		p-value	0.337	0.171	.006*
	Gynecological	Extend stage (n=61)	54.3±26.1	64.6±17.6	57.5±20.6
		Long-term stage (n=21)	64.7±20.0	67.1±15.6	63.4±18.5
		p-value	0.167	0.636	0.293
1) SF-36 : Medical Outcomes Study Short Form 36 Health Status Survey has 8 categories, then they are divided again physical Component Summary (Physical functioning, Role physical, Bodily pain and General health) and Mental Component Summary (Vitality, Social functioning, Role emotional and Mental health). Each category score range from 0 to 100, and greater number indicating a better QOL.
2) All values are mean±SD
3) Significant difference at * (p<0.05) was found by Chi-square test for categorical variables
